# Supplementary material for: Modeling climate change impact on dryland wheat production for increased crop yield in the Free State, South Africa, using GCM projections and the DSSAT model
Source: Frontiers journal article supplement (doi:10.3389/fenvs.2023.1067008), 2023-07-17
Supplement: Table_1.xlsx [file Table_1.xlsx]

## Sheet: Sheet1
Title	Name	Studies	University	Year	Location	Plots	Experiment period	Altitude	Cultivar	Planting dates	Planting type	Tillage	Harvesting date	planting method	planting distribution	planting popukltaion at seeding	row spacing	planting depth
INFLUENCE OF CROPPING SEQUENCE ON WHEAT PRODUCTION UNDER CONSERVATION AGRICULTURE IN THE EASTERN FREE STATE	MAGDALENA HENDRIKA VISSER	MSc	UFS	2014	ARC-SGI-Bethlehem	11 m × 55 m	2008-2011	1696 m	Elands	17/07/2009; 07/07/2010			30/12/2009; 30/12/2010	dry seeds	rows	68 using sensaco calc	45	6cm
COMPARISON OF SOIL PHOSPHORUS FRACTIONS AFTER 37 YEARS OF WHEAT PRODUCTION MANAGEMENT PRACTICES IN A SEMI-ARID CLIMATE	KHANYISILE NCOYI	MSc	UFS	2019	ARC-Small Grain Institute	30 m x 6 m x 10 m	38 years	1680 m
THE INFLUENCE OF ENVIRONMENTAL FACTORS AND AGRICULTURAL PRACTICES ON WHEAT FALLING NUMBER	MARYKE CRAVEN	PHD	UFS	2006	ARC-Small Grain Institute( under rainfed conditions	2.4 m x 5 m x 40 cm	2001-2005		Gariep, Tugela-DN and Elands)
EVALUATING CLIMATE ADAPTATION STRATEGIES FOR DISASTER RISK MANAGEMENT:CASE STUDY FOR BETHLEHEM WHEAT FARMERS, SOUTH AFRICA	KGADIKO LUCAS SERAGE	MSc	UFS	2017	The Bethlehem area (Thabo Mofutsanyana District)			1200 m - 1640 m
ENVIRONMENTAL INFLUENCE ON THE EXPRESSION OF WHEAT PROTEIN FRACTIONS UNDER SOUTH AFRICAN DRYLAND CONDITIONS	BAREND SMIT WENTZEL	PHD	UFS	2017	Bultfontein (Bult) and Bothaville (Bot) in the North Western Free State (NW-FS): low rainfall, high temperatures, high evaporation requirements and deep, yellow sandy loam soils. Bethlehem (Bhm) and Clarens (Clar) in the Eastern Free State (E-FS): higher rainfall, lower temperatures, lower evaporation requirement with predominantly yellow soils of average effective depth	5 m x 5 m x 45 cm	2007, 2009		BettaDN, Caledon, Elands, Gariep, Komati, Limpopo, Matlabas, PAN 3118, PAN 3349, PAN 3377
THE EFFECT OF WATER QUALITY ON THE GROWTH AND YIELD OF IRRIGATED CROPS	SHADRACK BATSILE DIKGWATLHE	MSc	UFS	2006	Glasshouse experiment- not used
EFFECT OF POTASSIUM HUMATE ON SOIL PROPERTIES AND GROWTH OF WHEAT	JOHAN TOBIAS VAN TONDER	MSc	UFS	2008	POT experiment-not used
LONG-TERM EFFECTS OF TILLAGE PRACTICES ON BIOLOGICAL INDICATORS OF A SOIL CROPPED ANNUALLY TO WHEAT	HANNAH GUDRUN CLAYTON	MSc	UFS	2012	n Bethlehem, Free State, South Africa	6 m x 30 m x 10 m	2010, 2011	1680 m	Elands
LONG-TERM EFFECTS OF RESIDUE MANAGEMENT ON SOIL FERTILITY INDICATORS, NUTRIENT UPTAKE AND WHEAT GRAIN YIELD	PALO FRANCIS LOKE	MSc	UFS	2012
THE EFFECTS OF CHLORMEQUAT CHLORIDE AND ETHEPHON ON SELECTED SMALL GRAIN CEREALS IN SOUTH AFRICA	SANESH RAMBURAN	MSc	UKZN	2006	Bethlehem		2003, 2004		Kariega (lodging susceptible), Olifants (lodging tolerant), and SST 876 (lodging tolerant).	27/06/2003; 22/06/2004

## Sheet: Sheet2
Chemicals-herbicides etc	Land types	Fertilizers	Irrigation
Vitavax® 200FF (active ingredients: Carboxin and Thiram) and Gaucho® 350FS (active ingredient Imidacloprid) to protect emerging seedlings against potential soil fungal diseases. The herbicides Glyphosate (Round-upTM) and Atrazine (Robyn)	Westleigh form with an orthic Ahorison of 40 cm and a plinthic B-horison of 70 cm	2:1:0(30) and LAN(28) at rates of 150 kg ha-1 and 50 kg ha-1, respectively	Rainfed
herbicides glyphosate and Paraquat were used alternatively	plinthic catena where upland duplex and/or margalitic soils are common	three levels of nitrogen fertilization (20, 30, and 40 kg N ha-1 until 2003, thereafter 20, 40 and 60 kg N ha-1
		LAN, superphosphate and potassiumchloride.20 N, 5 P, 5 K kg/ha (standard) and 60 N, 15 P and 15 K kg/ha (optimal).
		6:2:1 (31) fertiliser was applied. Total N per hectare given was 50 kg, total P: 17 kg and total K: 9 kg
herbicide containing glyphosate, glyphosate and paraquat were alternated	This Plinthosol (FAO, 1978) contains the following diagnostic horizons: from 0-30 cm, an orthic Ap; at 30-65 cm, a yellow-brown apedal B1; followed by a soft plinthic B2 at the depth greater than 65 cm	40 kg N ha-1
chlormequat chloride (applied as CeCeCe®) - ethephon (applied as Ethapon®) PGR combination of both active ingredients (applied as Uprite®	Avalon Mafikeng loam soil typ	180 kg N ha", 26 kg P ha" and 13 kg K ha' in the form of 3:2:1 (25) and LAN (28)
